# Supplementary material for: Novel PEPPSI-Type NHC Pd(II) Metallosurfactants on the Base of 1H-Imidazole-4,5-dicarboxylic Acid: Synthesis and Catalysis in Water–Organic Media
Source: MDPI journal article supplement (doi:10.3390/nano12224100), 2022-11-21
Supplement: s1 [file s1]

# Novel PEPPSI-Type NHC Pd(II) Metallosurfactants on the Base of 1H-Imidazole-4,5-Dicarboxylic Acid: Synthesis and Catalysis in Water–Organic Media

Vladimir Burilov <sup>1,\*</sup>, Dmitriy Radaev <sup>1</sup>, Elza Sultanova <sup>1</sup>, Diana Mironova <sup>1</sup>, Daria Duglav <sup>1</sup>, Vladimir Evtugyn <sup>2</sup>, Svetlana Solovieva <sup>3</sup> and Igor Antipin <sup>1</sup>

<sup>1</sup> Kazan Federal University, 18 Kremlevskaya st., 420008 Kazan, Russia

<sup>2</sup> Interdisciplinary Center for Analytical Microscopy, Kazan Federal University, 18 Kremlevskaya st, 420008 Kazan, Russia

<sup>3</sup> Arbuzov Institute of Organic and Physical Chemistry, FRC Kazan Scientific Center of RAS, 8 Arbuzov str., 420008 Kazan, Russia

\* Correspondence: ultrav@bk.ru; Tel.: +7-843-2337344

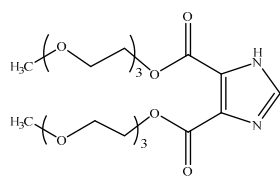

vbdr114

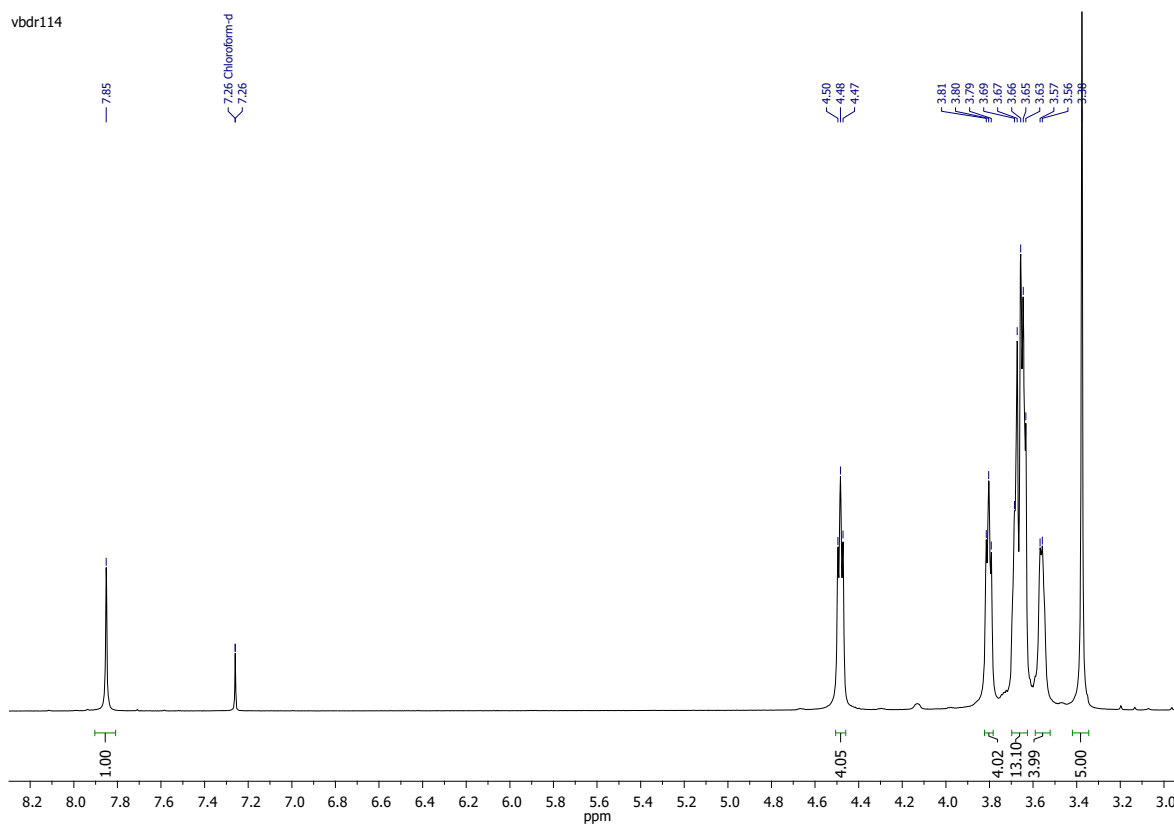

(a)

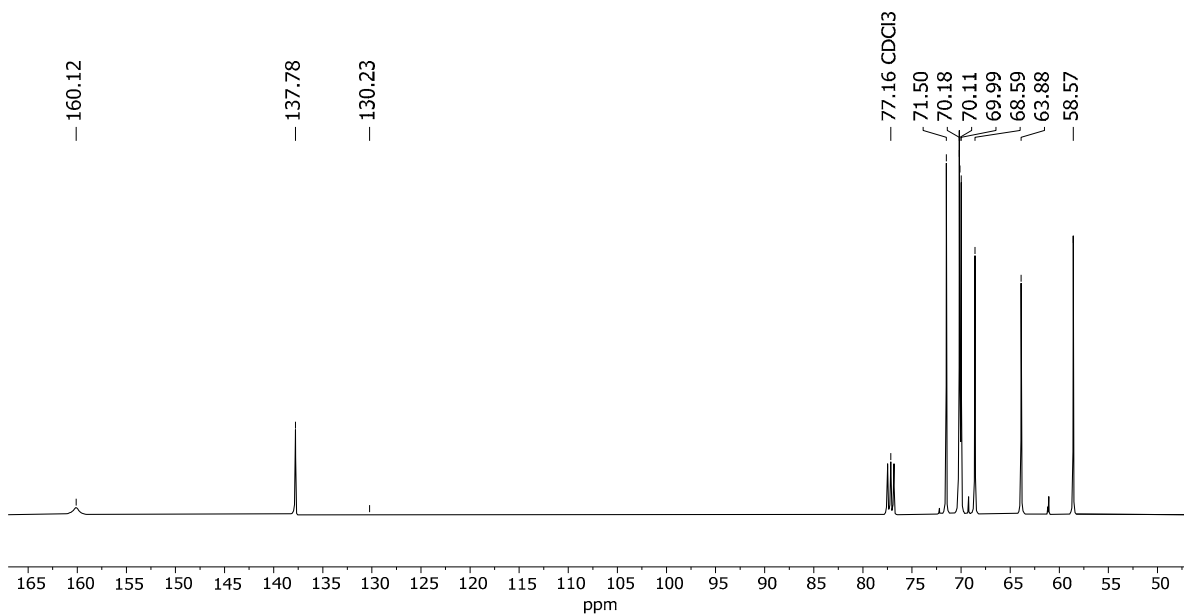

(b)

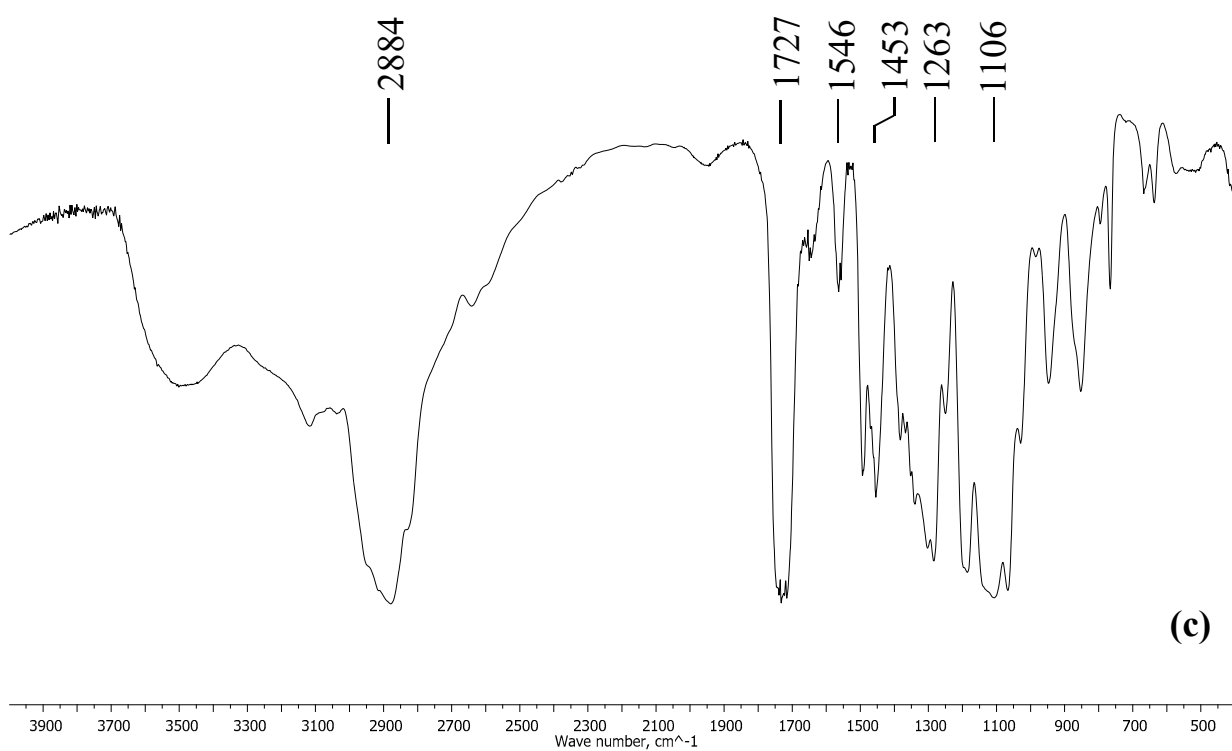

(c)

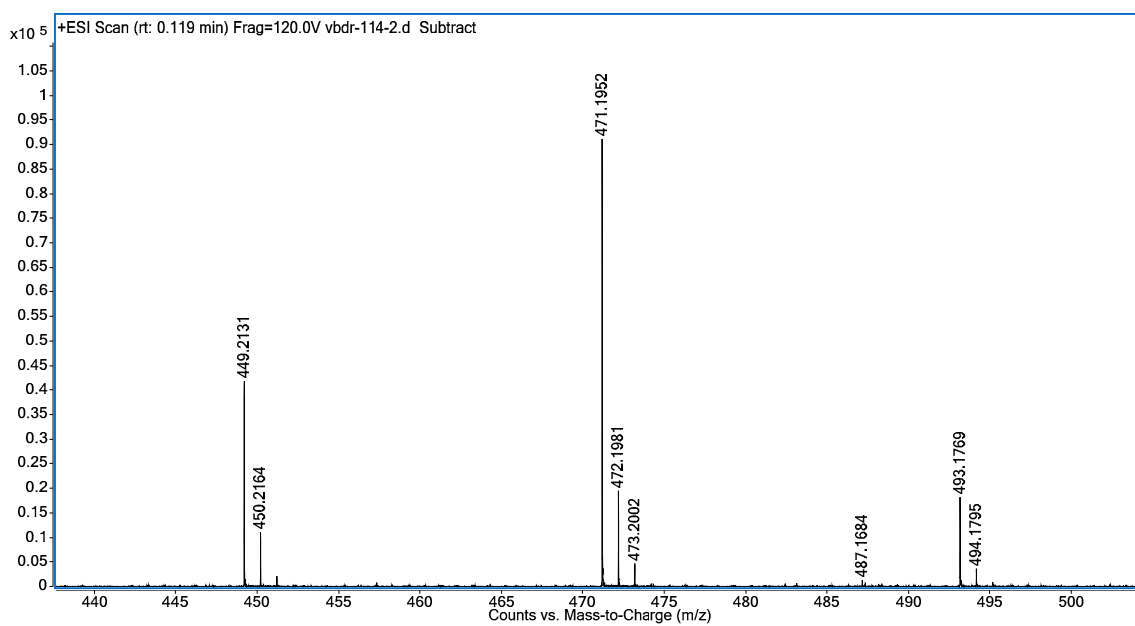

(d)

**Figure S1.** NMR <sup>1</sup>H (a), <sup>13</sup>C (b), FT IR (c) and HRESI MS (d) spectra of 4,5-bis-[2-(2-(2-methoxyethoxy)ethoxy)ethoxycarbonyl]imidazole (**1**).

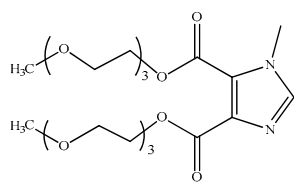

vbdp-24-e

7.26 Chloroform-d

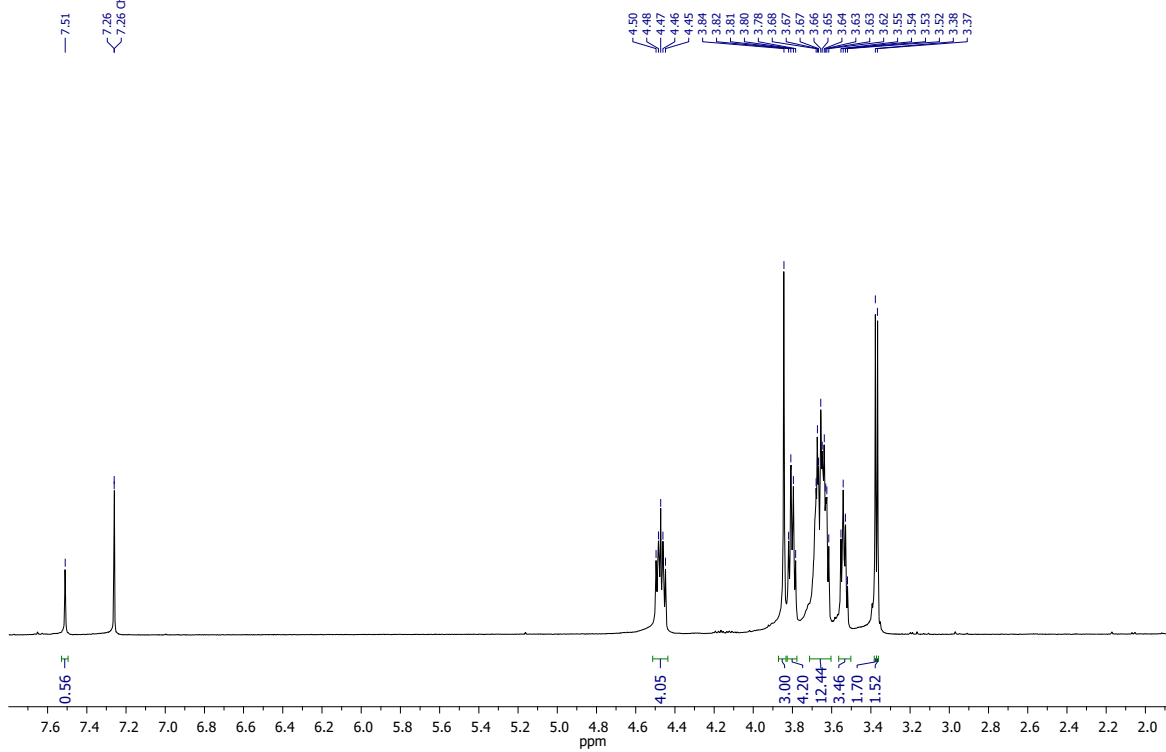

(a)

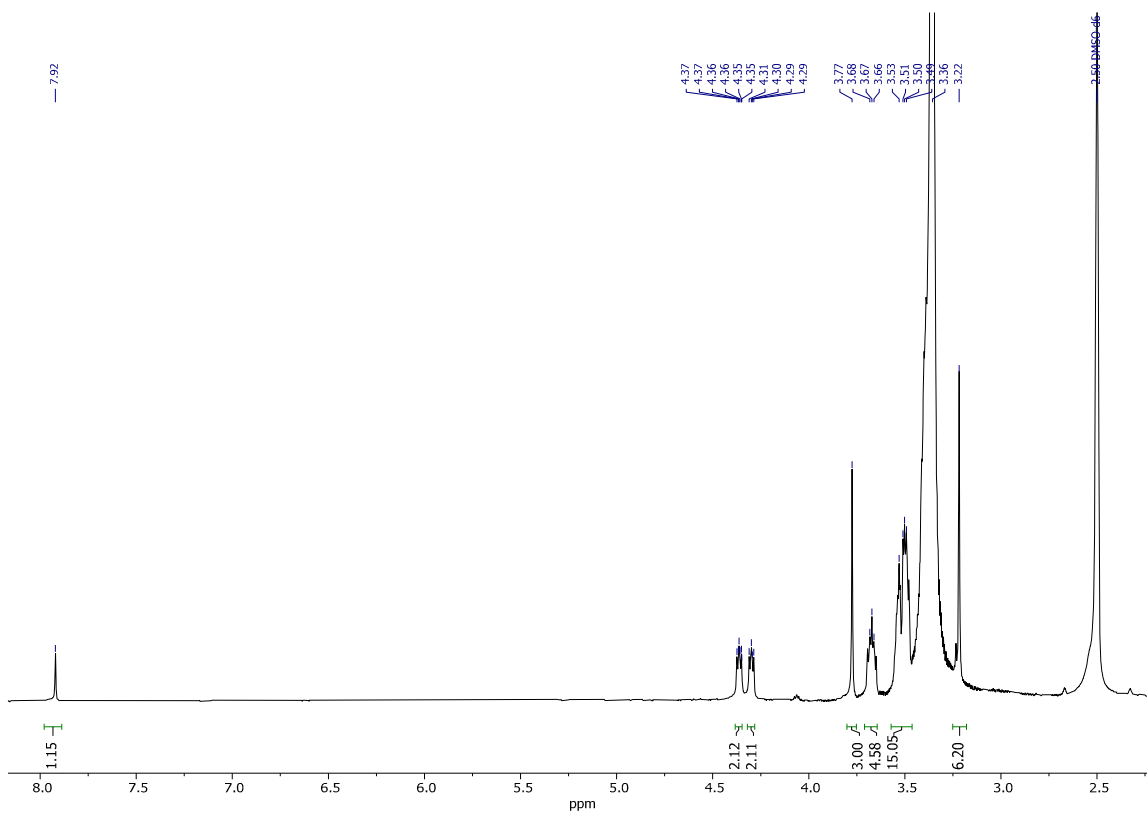

(b)

vbdr-239-C13

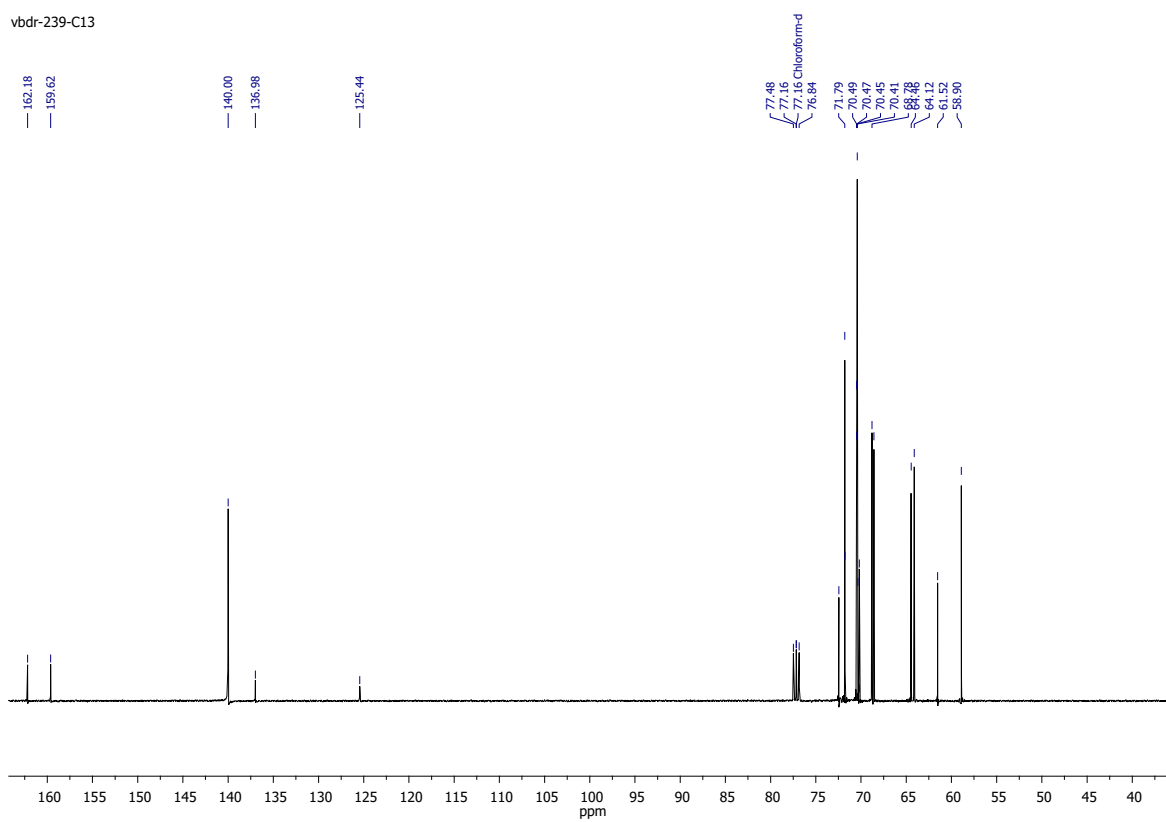

(c)

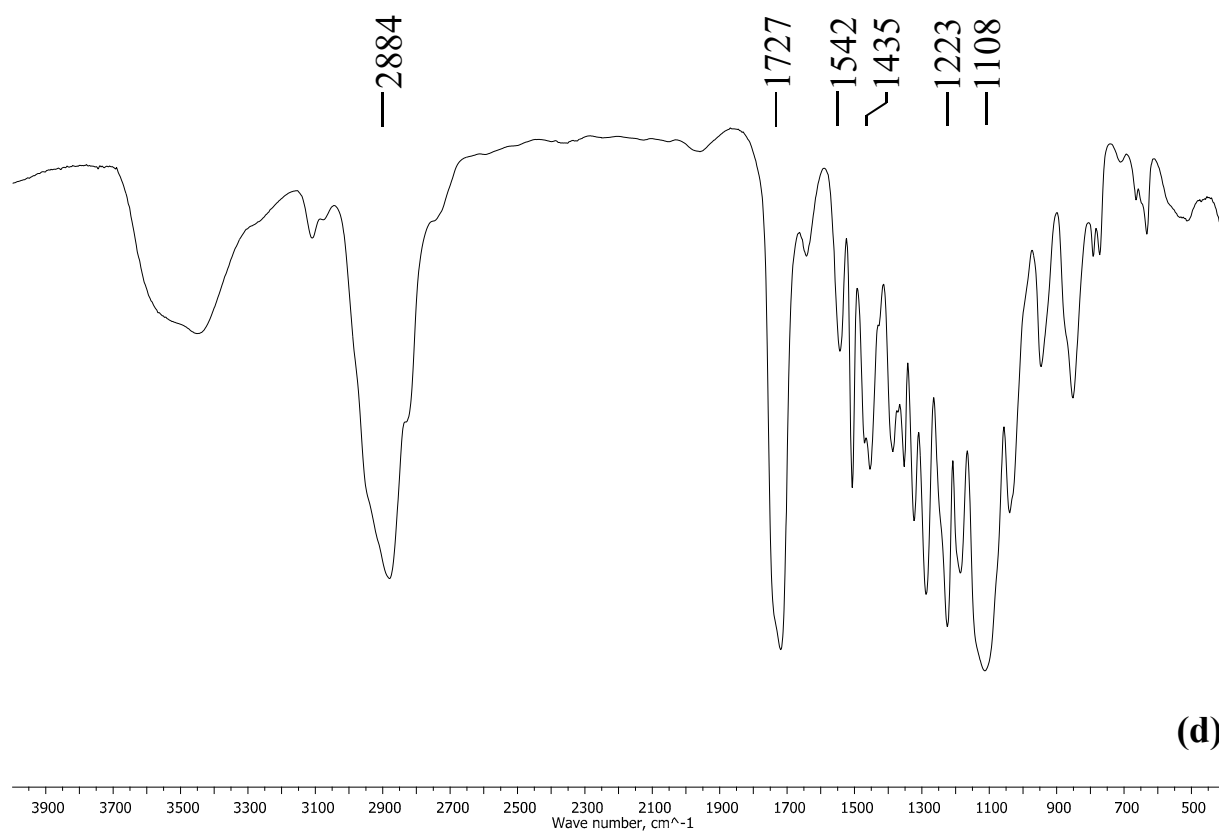

(d)

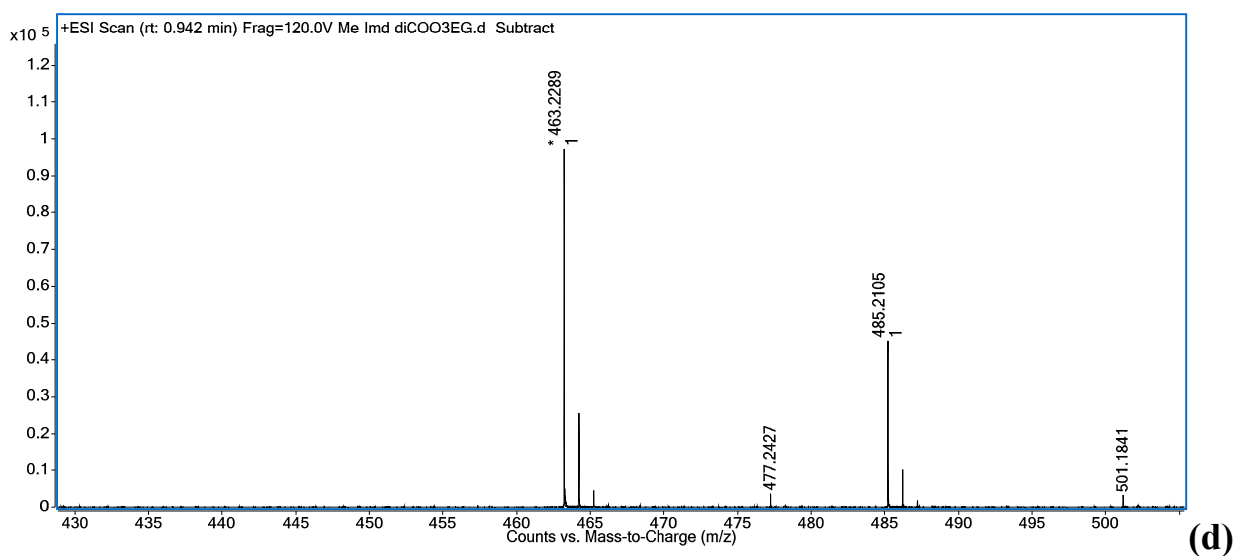

**Figure S2.** NMR  $^1\text{H}$  in  $\text{CDCl}_3$ (a), NMR  $^1\text{H}$  in  $\text{DMSO}-d_6$  (b),  $^{13}\text{C}$  (c), FT IR (d) and HRESI MS (e) spectra of 4,5-bis-[2-(2-(2-methoxyethoxy)ethoxy)ethoxycarbonyl]-1-methylimidazole (**2a**)

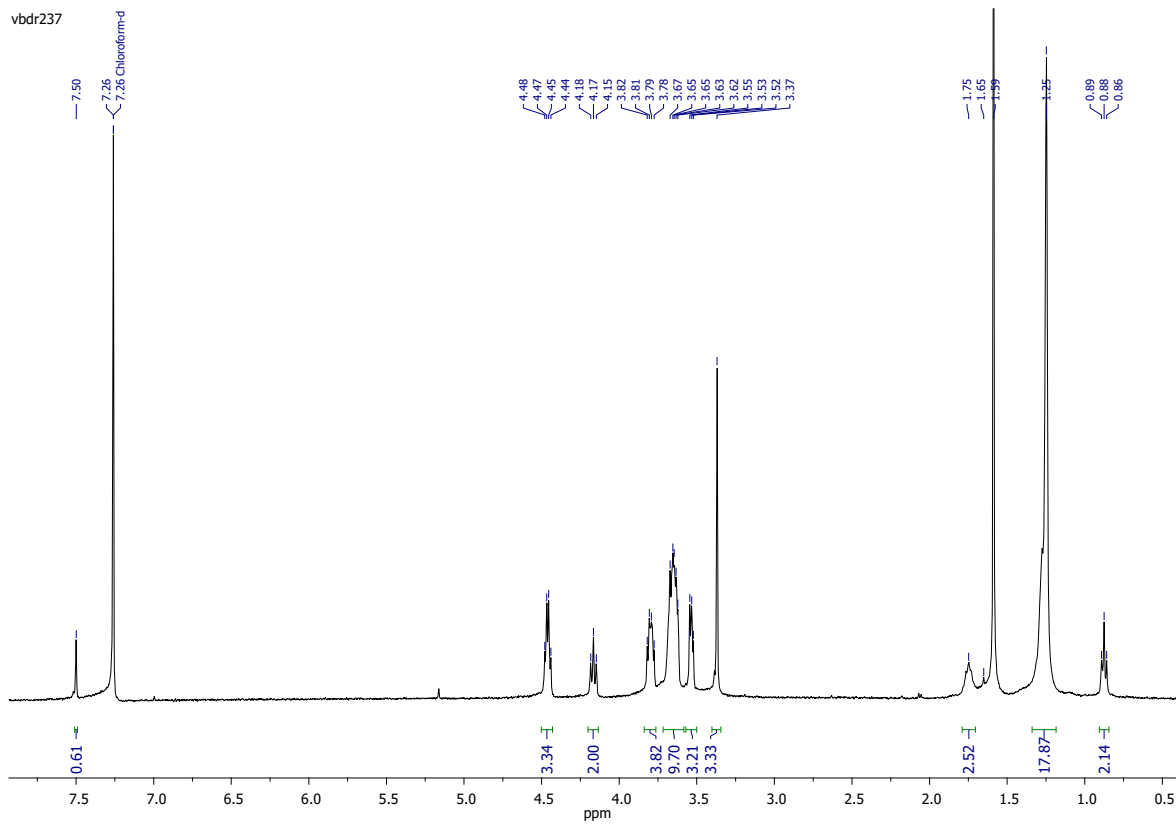

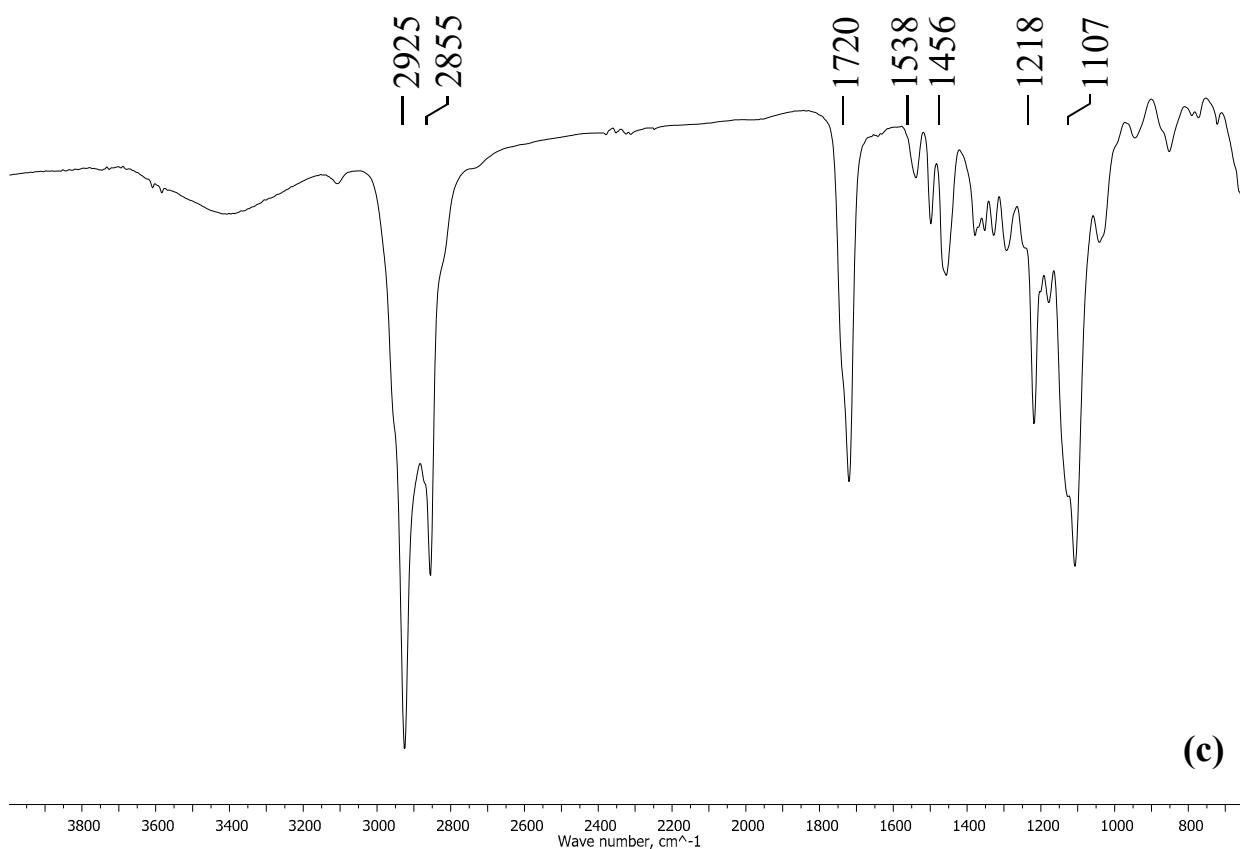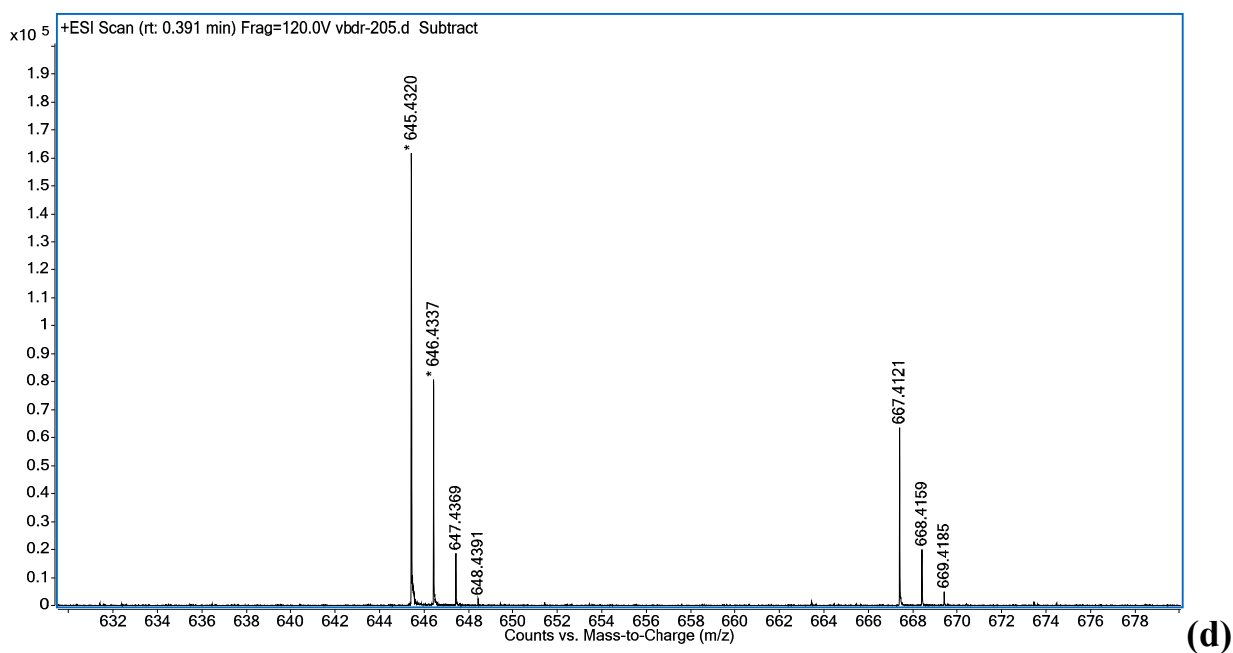

**Figure S3.** NMR  $^1\text{H}$  (a),  $^{13}\text{C}$  (b), FT IR (c) and HRESI MS (d) spectra of 4,5-bis-[2-(2-(2-methoxyethoxy)ethoxy)ethoxycarbonyl]-1-tetradecylimidazole (**2b**)



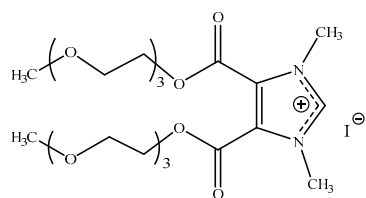

vbdr250

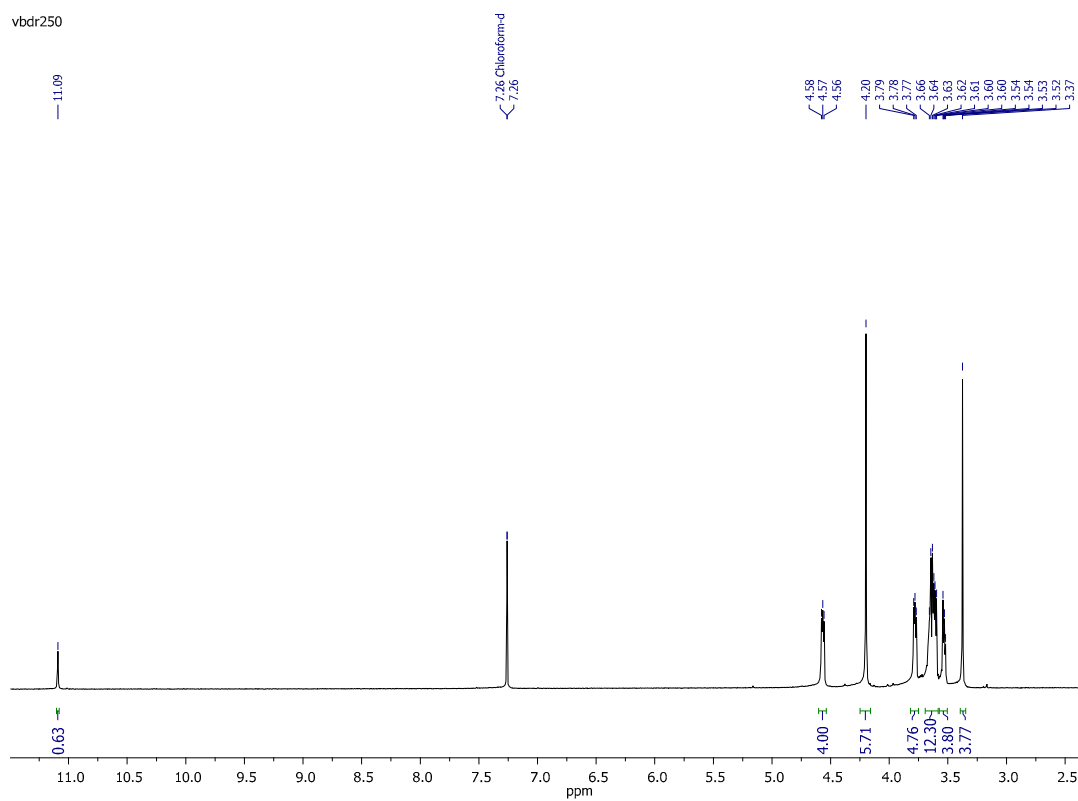

(a)

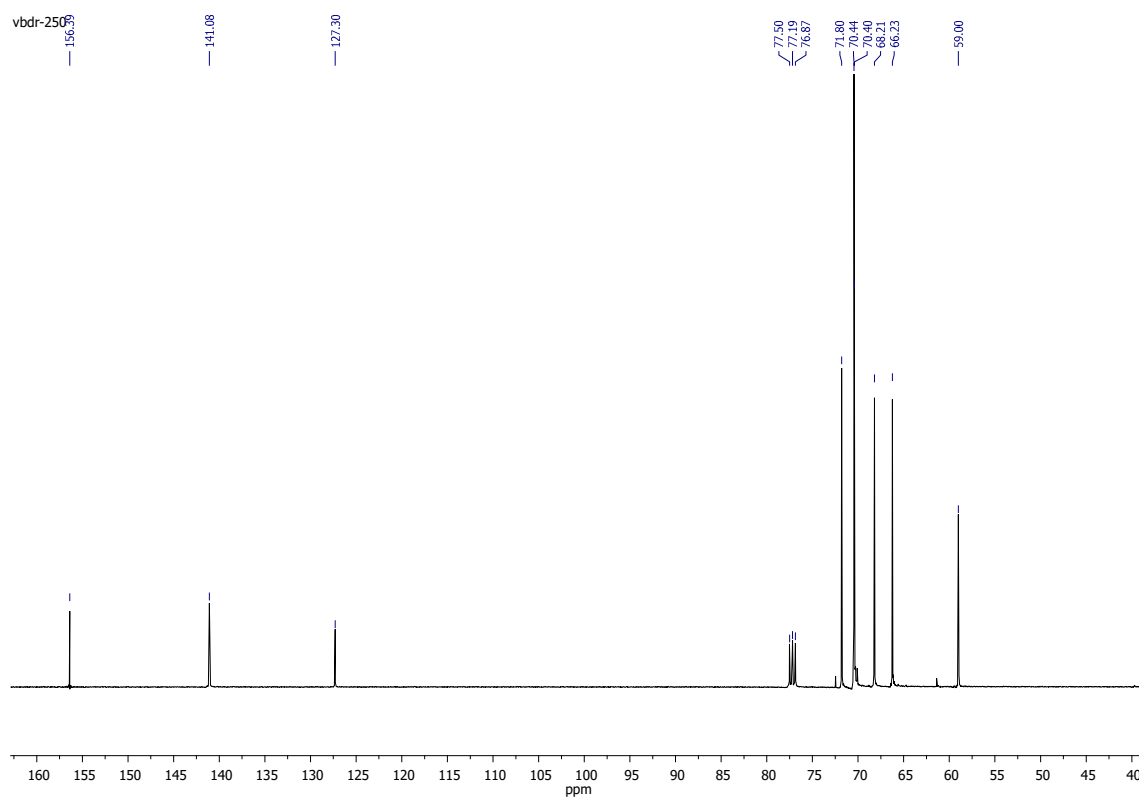

(b)

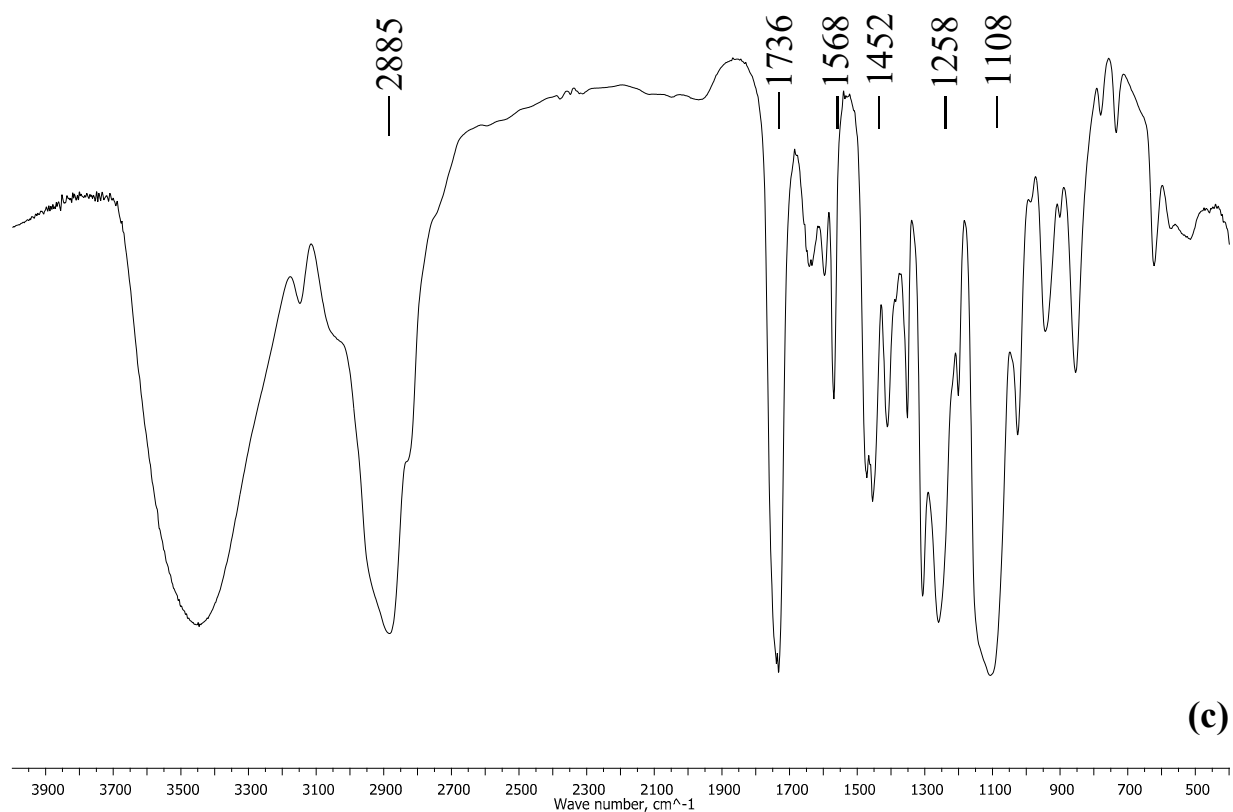

(c)

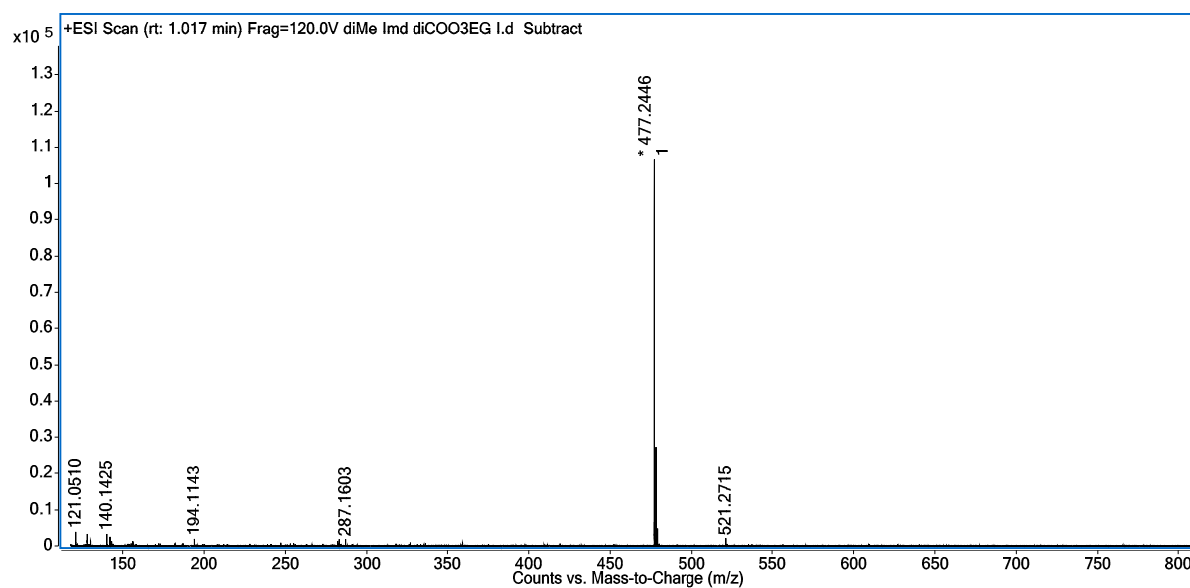

(d)

**Figure S4.** NMR <sup>1</sup>H (a), <sup>13</sup>C (b), FT IR (c) and HRESI MS (d) spectra of 4,5-bis[2-(2-methoxyethoxy)ethoxy)ethoxycarbonyl]-1,3-dimethyl-imidazolium iodide (**3a**)

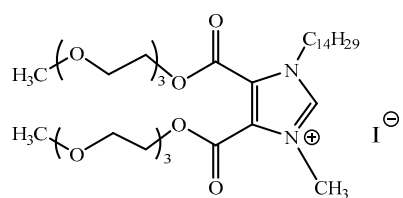

vbdp-11

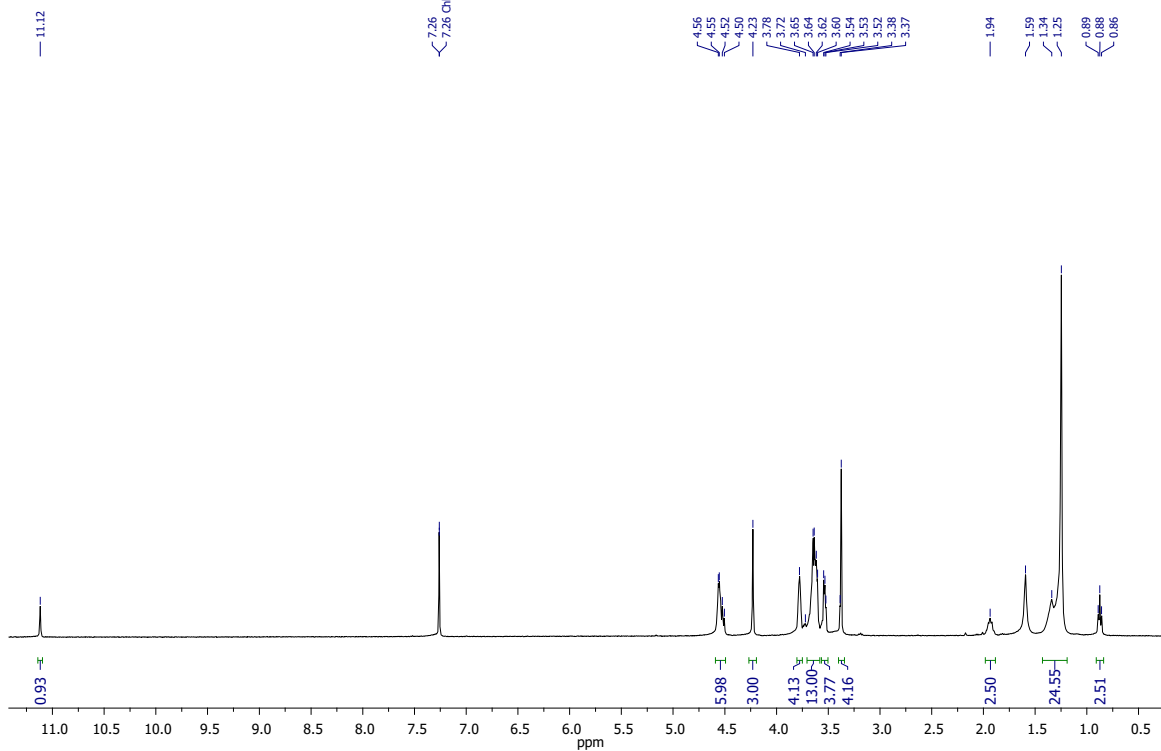

(a)

vbdr228c13-2

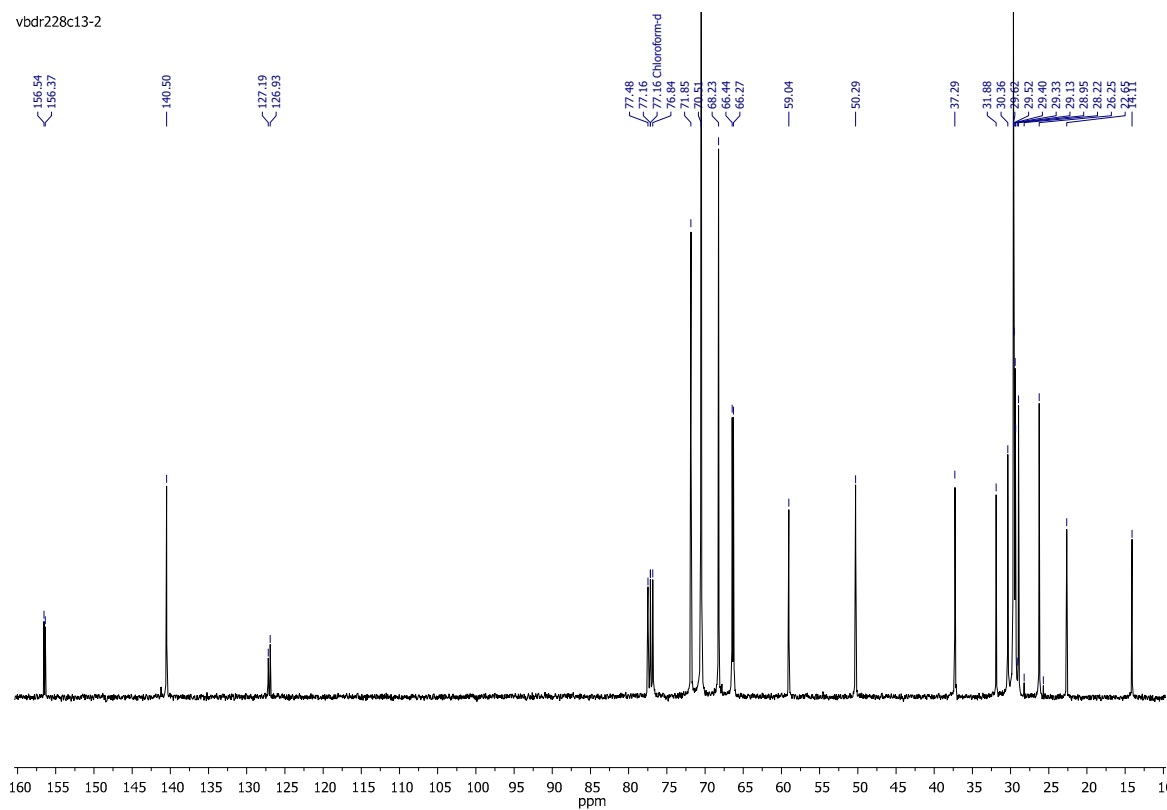

(b)

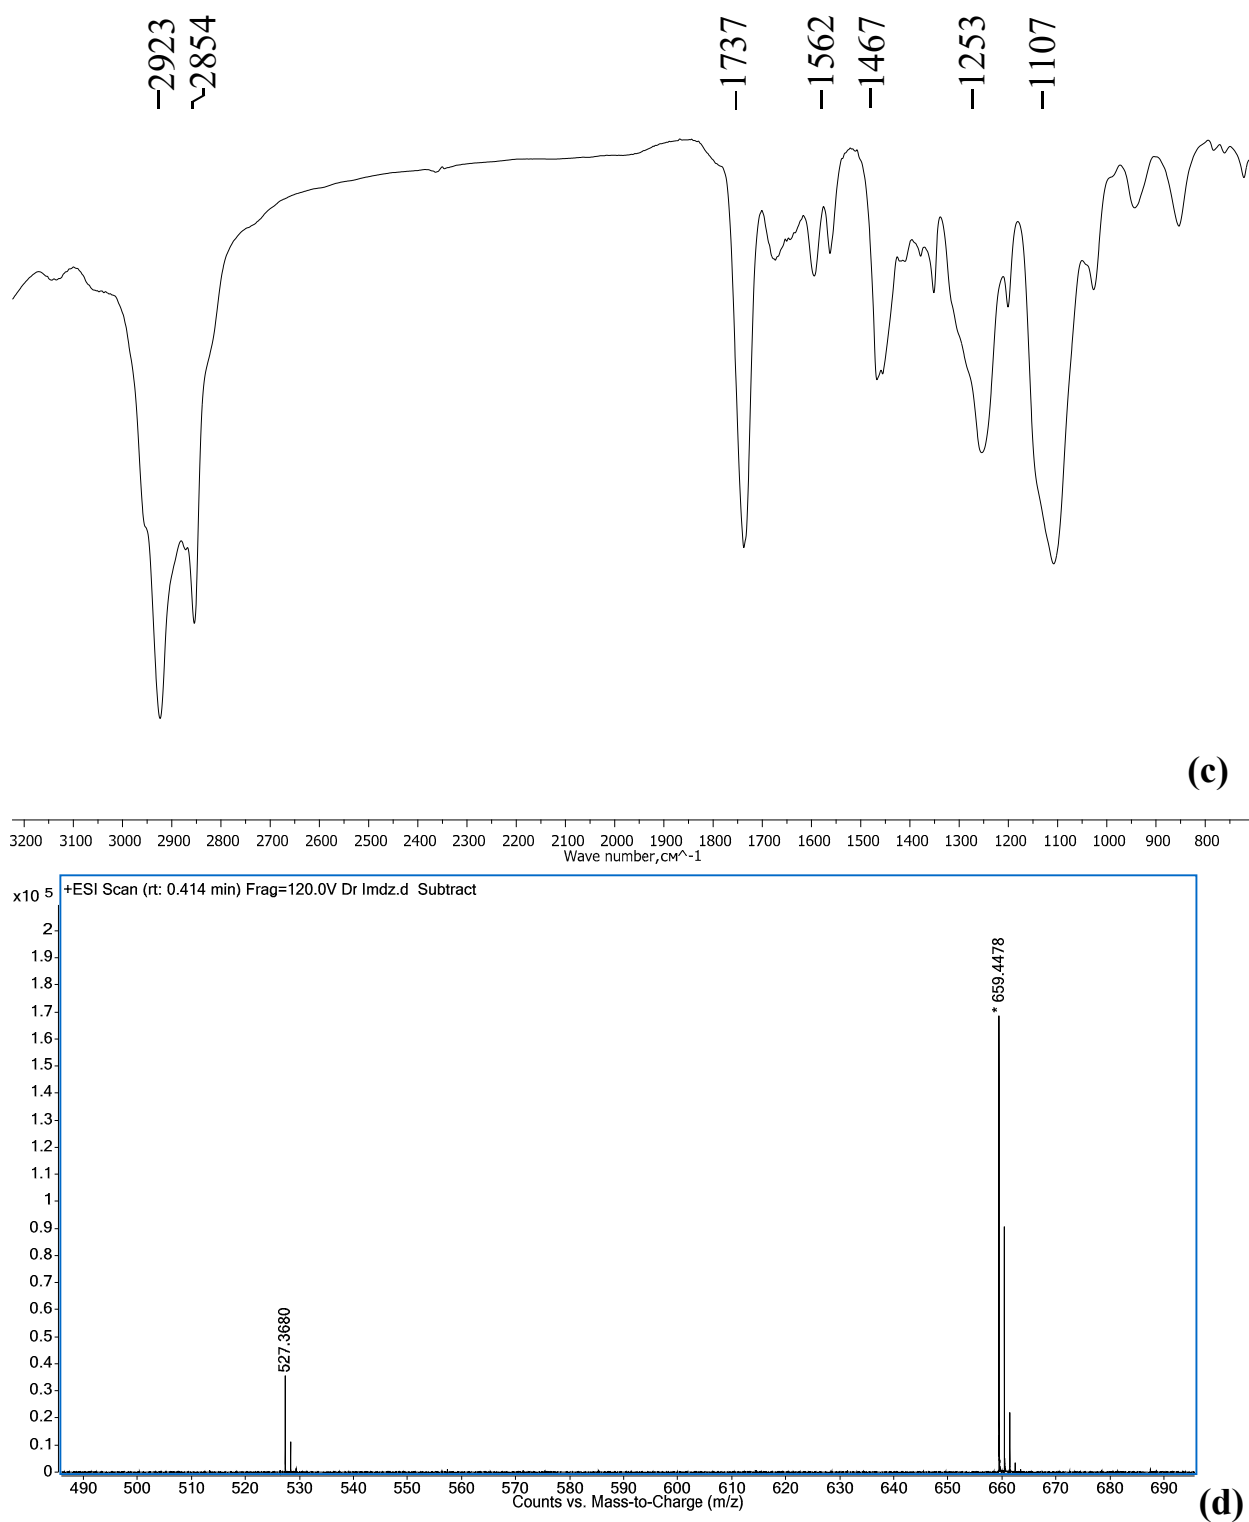

**Figure S5.** NMR <sup>1</sup>H (a), <sup>13</sup>C (b), FT IR (c) and HRESI MS (d) spectra of 4,5-bis[2-(2-methoxyethoxy)ethoxycarbonyl]-1-methyl-3-tetradecylimidazolium iodide (**3b**)

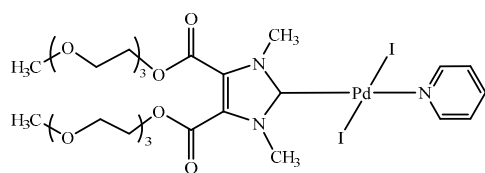

vbdn-251-7

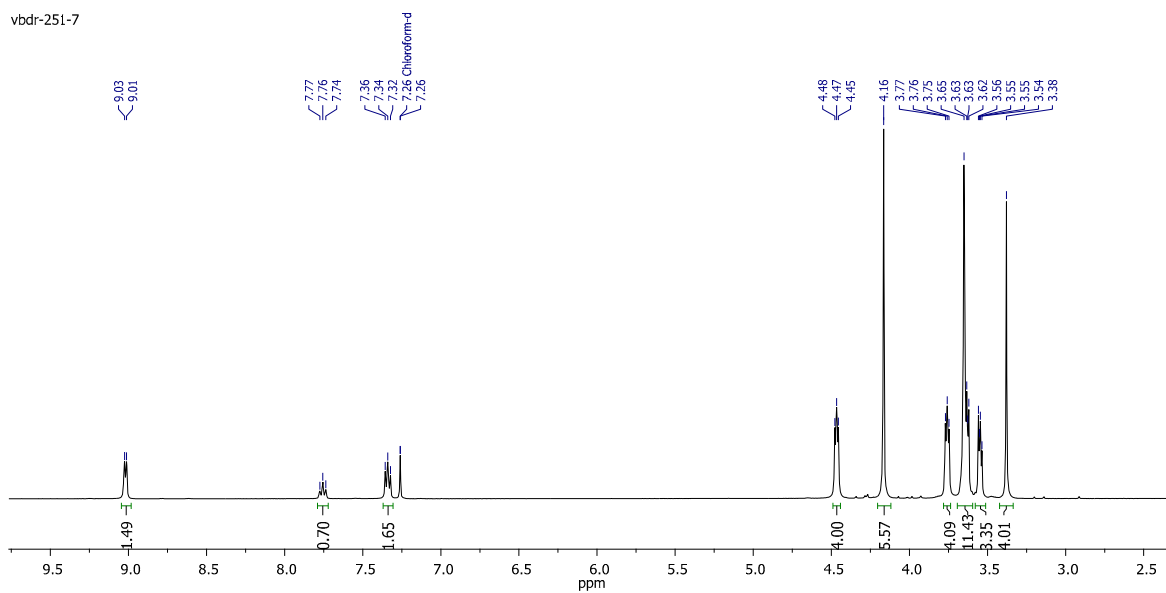

(a)

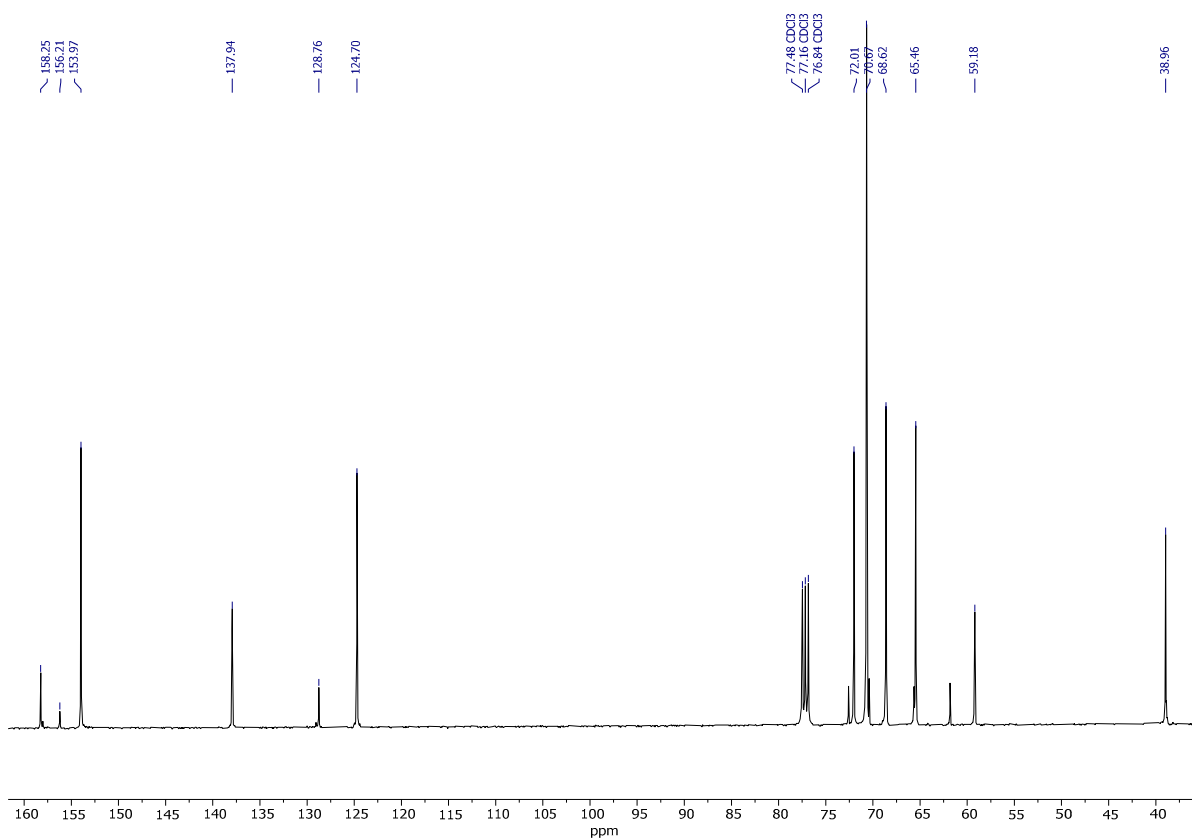

(b)

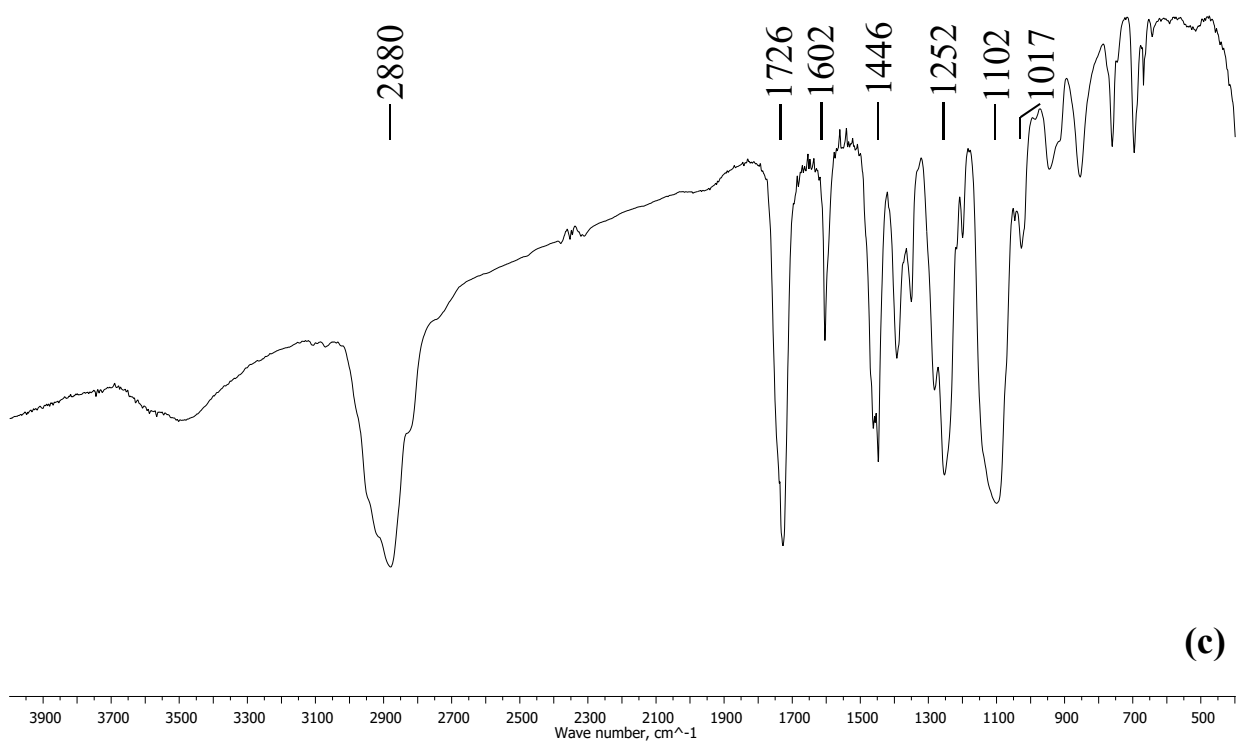

(c)

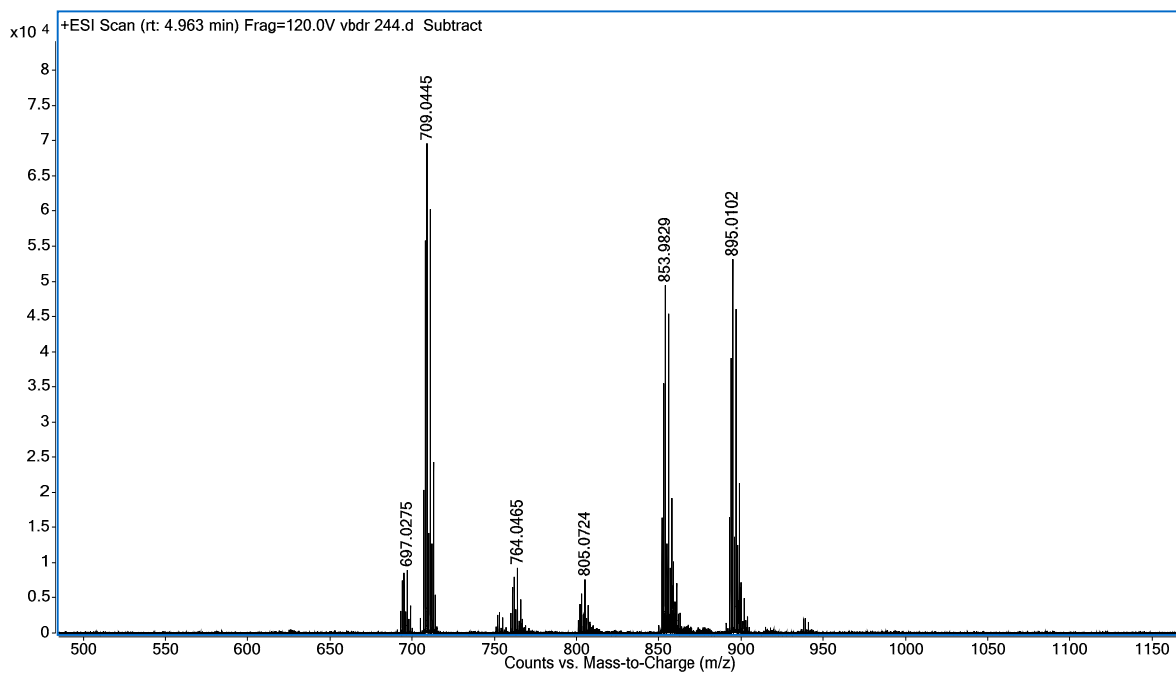

(d)

**Figure S6.** NMR <sup>1</sup>H (a), <sup>13</sup>C (b), FT IR (c) and HRESI MS (d) spectra of *trans*-{4,5-bis[2-(2-(2-methoxyethoxy)ethoxy)ethoxycarbonyl]-1,3-dimethylimidazolin-2-ylidene} {pyridine} palladium(II) diiodide (**4a**).

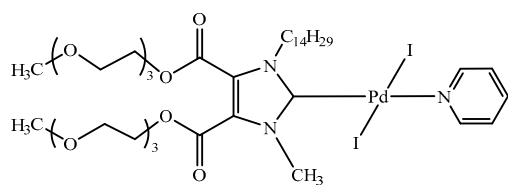

vbdp22-d

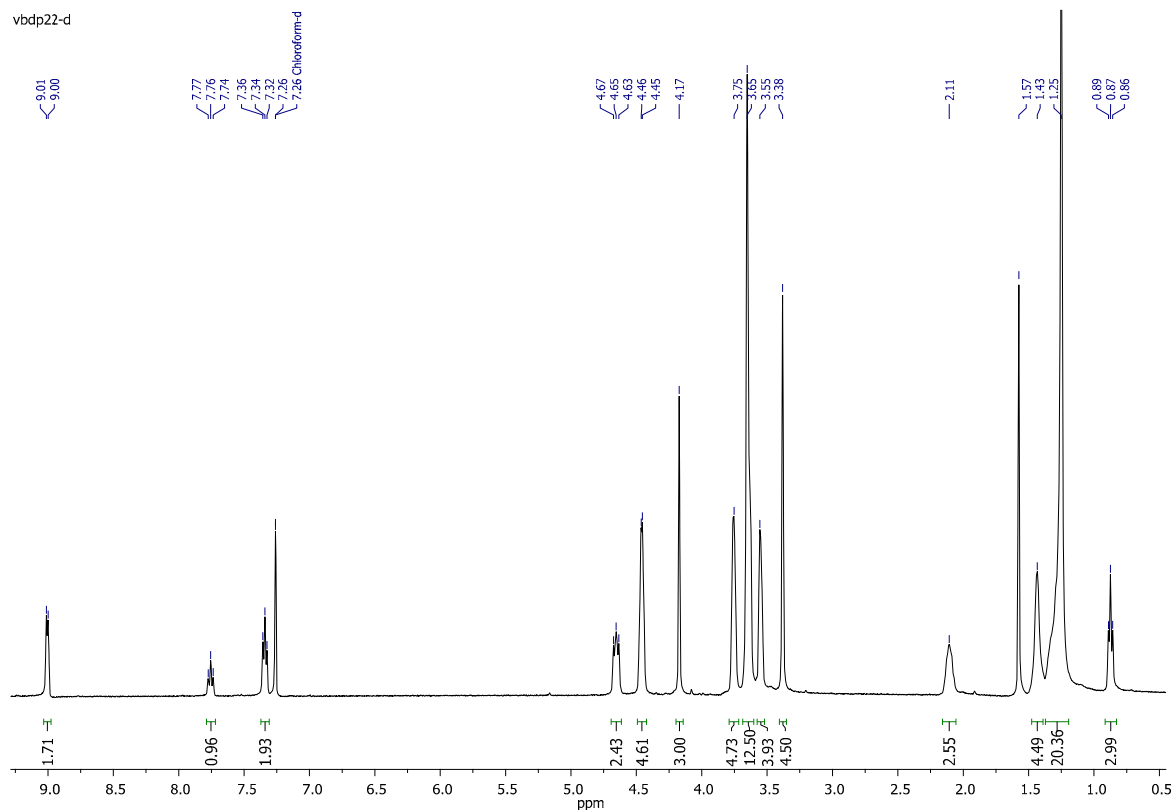

(a)

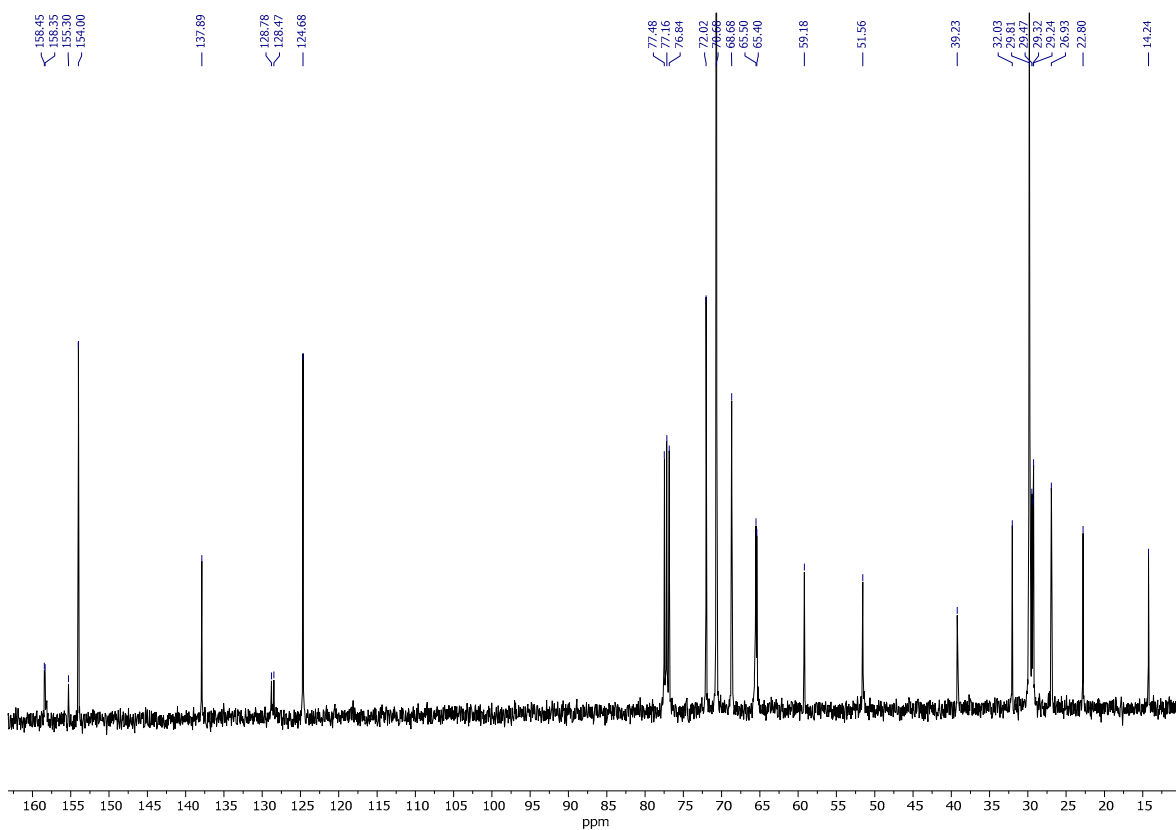

(b)

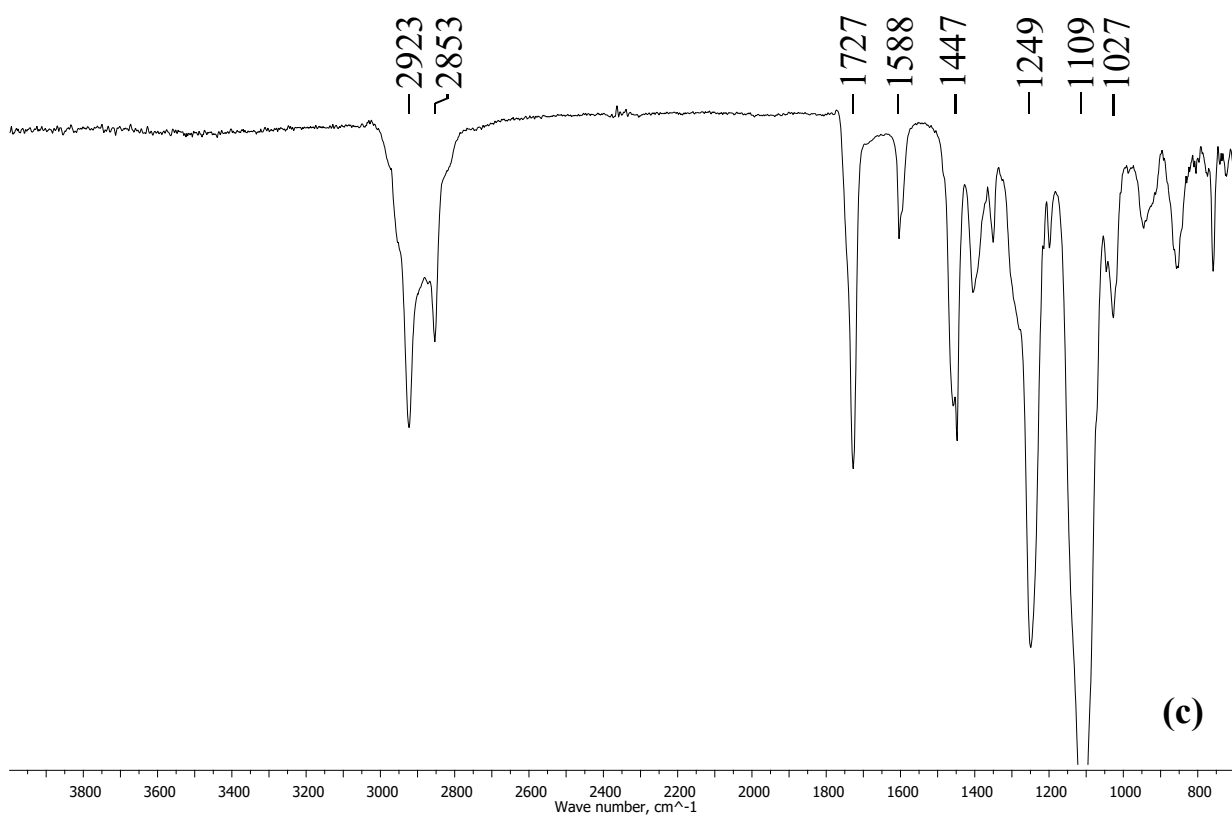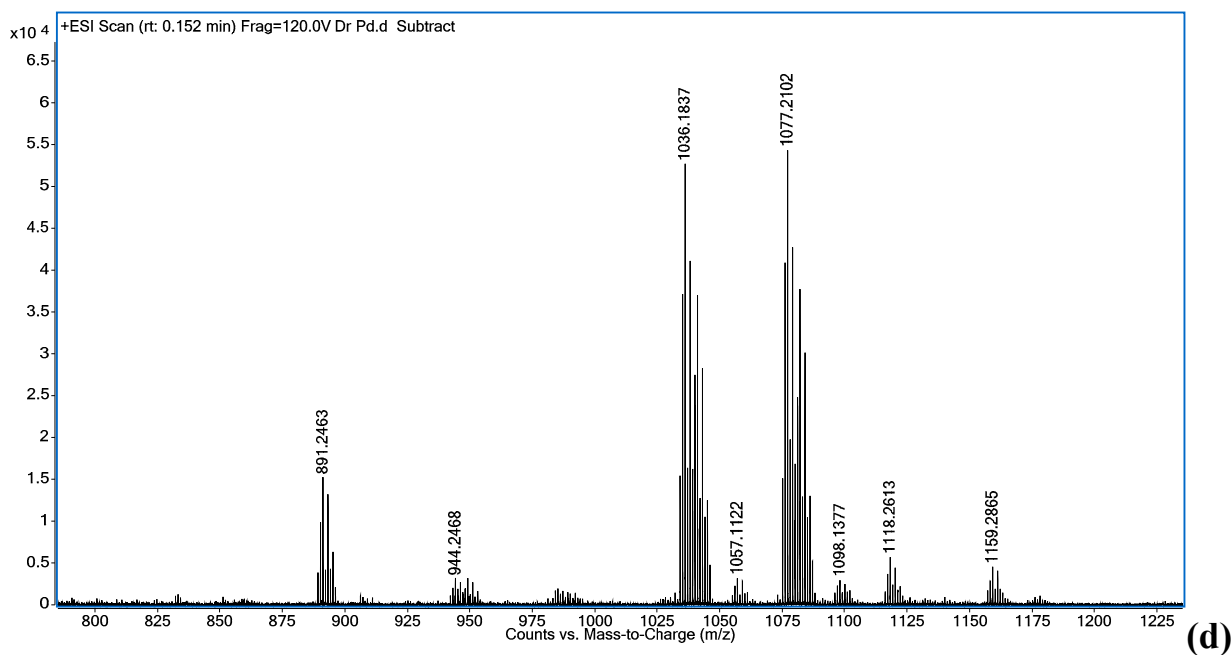

**Figure S7.** NMR <sup>1</sup>H (a), <sup>13</sup>C (b), FT IR (c), HRESI MS (d) spectra of *trans*-{4,5-bis[2-(2-(2-methoxyethoxy)ethoxy)ethoxycarbonyl]-1-methyl-3-tetradecylimidazolin-2-ylidene} {pyridine} palladium(II) diiodide (**4b**).



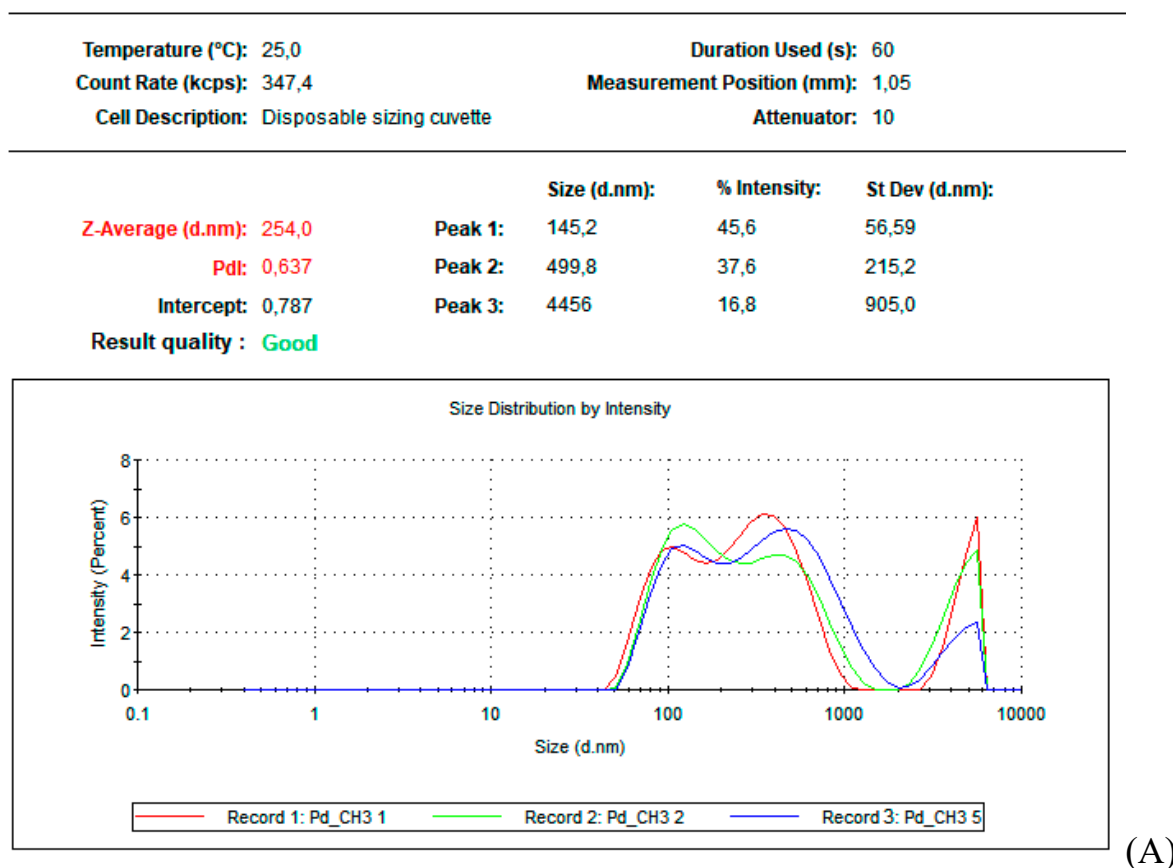

(A)

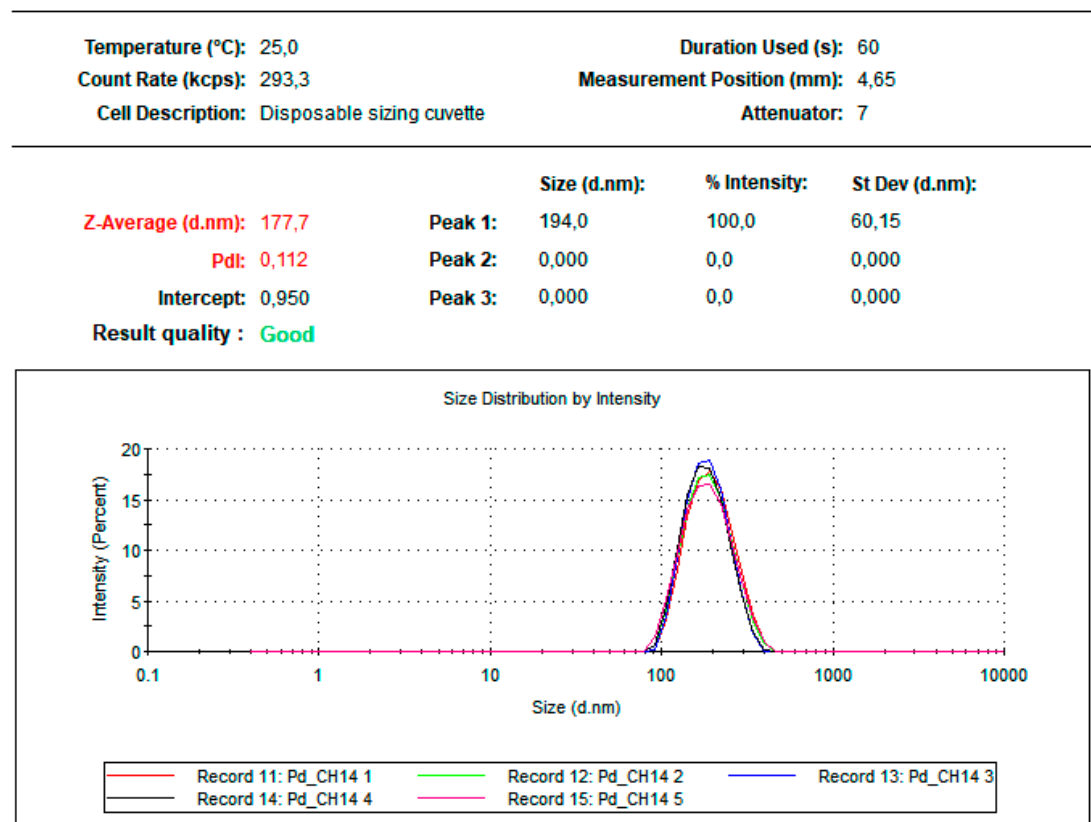

(B)

**Figure S8.** DLS intensity vs size graphs for solutions of **4a** (A) and **4b** (B) in water, C [4a,b]= 0.02 mM.
